# Supplementary material
Source: Springer Nature journal article supplement (https://www.springermedizin.de/resource/supplementary/12943_2009_554_MOESM6_ESM.pdf/9554958)

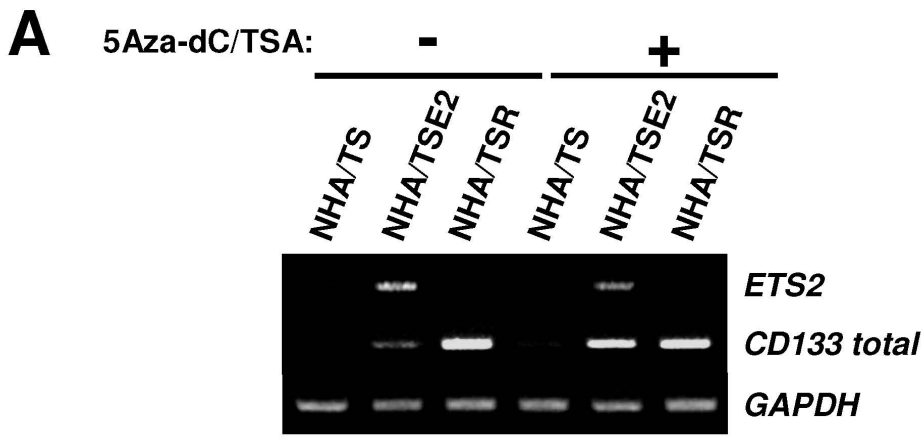

**B**

| Cell lines | Tumor development in NOD/SCID mice |
|------------|------------------------------------|
| NHA/TS     | 0/4                                |
| NHA/TSE2   | 0/4                                |
| NHA/TSR    | 4/4                                |
| NHA/TSC    | 0/4                                |

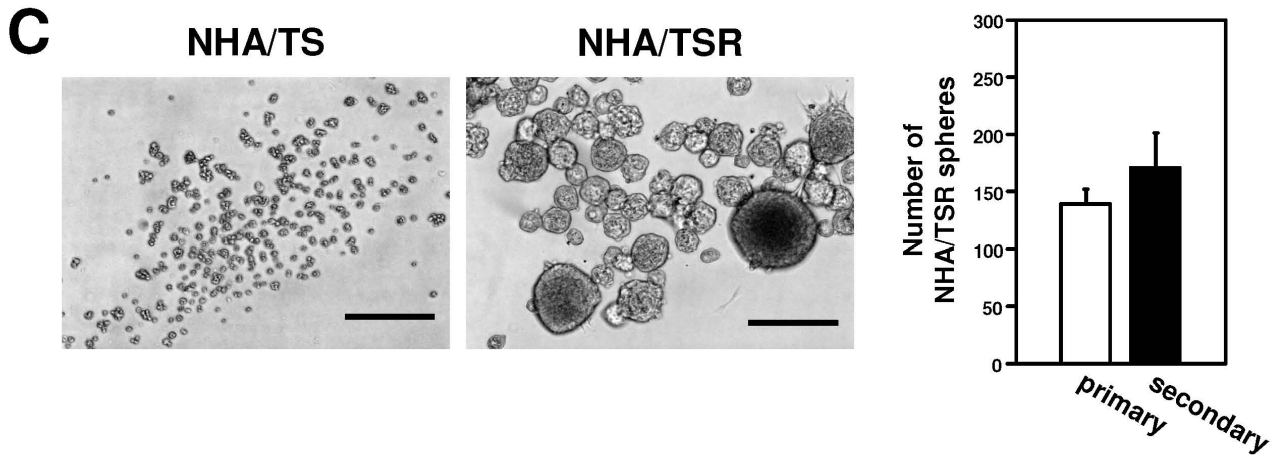

**D**                    TSR clonal sphere  
(forming efficiency: 26.4%)

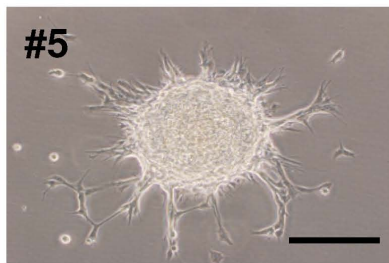

**E**                    #5  
secondary  
sphere

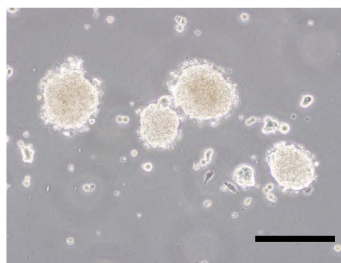

#5  
10%FBS  
differentiation

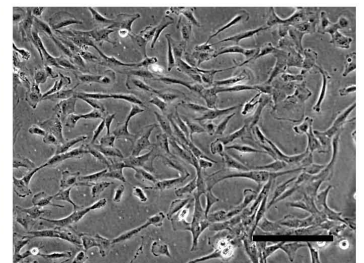

Supplement: MOESM6 [file 9554958]
